# Supplementary material
Source: publisher figshare collection journal article supplement (https://tandf.figshare.com/ndownloader/files/17337788)
Supplement: Supplementary file 1 [file 17337788]

Supplementary Table 1. Effects of bentonite addition and *Z. mays* cultivation on residual PCBi concentrations (ng g-1) in the soil containing 400 ng ƩPCBi g-1 after 5 weeks of incubation.

| PCBi | without plant cultivation | | | with maize cultivation | | |
| --- | --- | --- | --- | --- | --- | --- |
| **B0* (Control)** | **B2** | **B4** | **B0** | **B2** | **B4** |
| CB5 | 4.88a | 4.78a | 4.80a | 2.69b | 1.52c | 0.77d |
| CB18 | 4.85a | 5.63a | 4.96a | 4.21b | 3.30c | 2.30d |
| CB31 | 12.2a | 11.5a | 11.5a | 9.59b | 8.36c | 6.11d |
| CB44 | 8.11a | 8.39a | 7.89a | 6.15b | 5.19b | 3.37c |
| CB52 | 2.92a | 2.95a | 2.75a | 2.14a | 1.42b | 1.13b |
| CB66 | 12.6a | 12.5a | 12.7a | 12.3a | 10.4b | 8.85c |
| CB87 | 41.6a | 43.5a | 42.3a | 31.8b | 27.2c | 23.7d |
| CB101 | 7.24a | 7.58a | 7.45a | 6.08b | 3.24c | 1.33d |
| CB110 | 23.9a | 22.9a | 24.1a | 15.1b | 12.7bc | 10.6c |
| CB138 | 18.6a | 18.5a | 18.5a | 14.9b | 10.9c | 9.64c |
| CB141 | 72.2a | 73.3a | 72.4a | 40.8b | 31.1c | 23.5d |
| CB151 | 15.4a | 14.8a | 15.4a | 12.0b | 8.65c | 5.54d |
| CB153 | 19.5a | 18.5a | 19.8a | 16.1b | 11.2c | 8.94d |
| CB170 | 21.4a | 20.9a | 21.1a | 13.2b | 10.3c | 8.75d |
| CB180 | 12.5a | 12.4a | 12.6a | 11.3b | 8.29c | 6.19d |
| CB183 | 53.9 a | 53.8a | 53.0a | 33.3b | 25.5c | 23.1c |
| CB187 | 25.9 a | 25.2a | 25.8a | 20.9b | 18.5c | 14.4d |

Different letters in each row represent signiﬁcant differences with Tukey test (P< 0.05).

*: B0: 0% bentonite, B2: 2% bentonite, B4: 4% bentonite
